# Supplementary material for: Magnetically retrievable magnetite (Fe3O4) immobilized ionic liquid: an efficient catalyst for the preparation of 1-carbamatoalkyl-2-naphthols
Source: Royal Society of Chemistry journal article supplement (doi:10.1039/c5cy00849b), 2015-01-01

## Supporting Information

Magnetically retrievable magnetite (Fe<sub>3</sub>O<sub>4</sub>) immobilized ionic liquid: an efficient catalyst for the preparation of 1-carbamatoalkyl-2-naphthols

Harsh N. Dadhania,<sup>a</sup> Dipak K. Raval<sup>a</sup> and Abhishek N. Dadhania\*<sup>b</sup>

<sup>a</sup>*Department of Chemistry, Sardar Patel University, Vallabh Vidyanagar 388120, Gujarat India.*

<sup>b</sup>*Department of Chemical Sciences, P. D. Patel Institute of Applied Sciences, Charotar University of Science and Technology, Changa 388421, Gujarat India.*

<sup>1</sup>H NMR of 4a

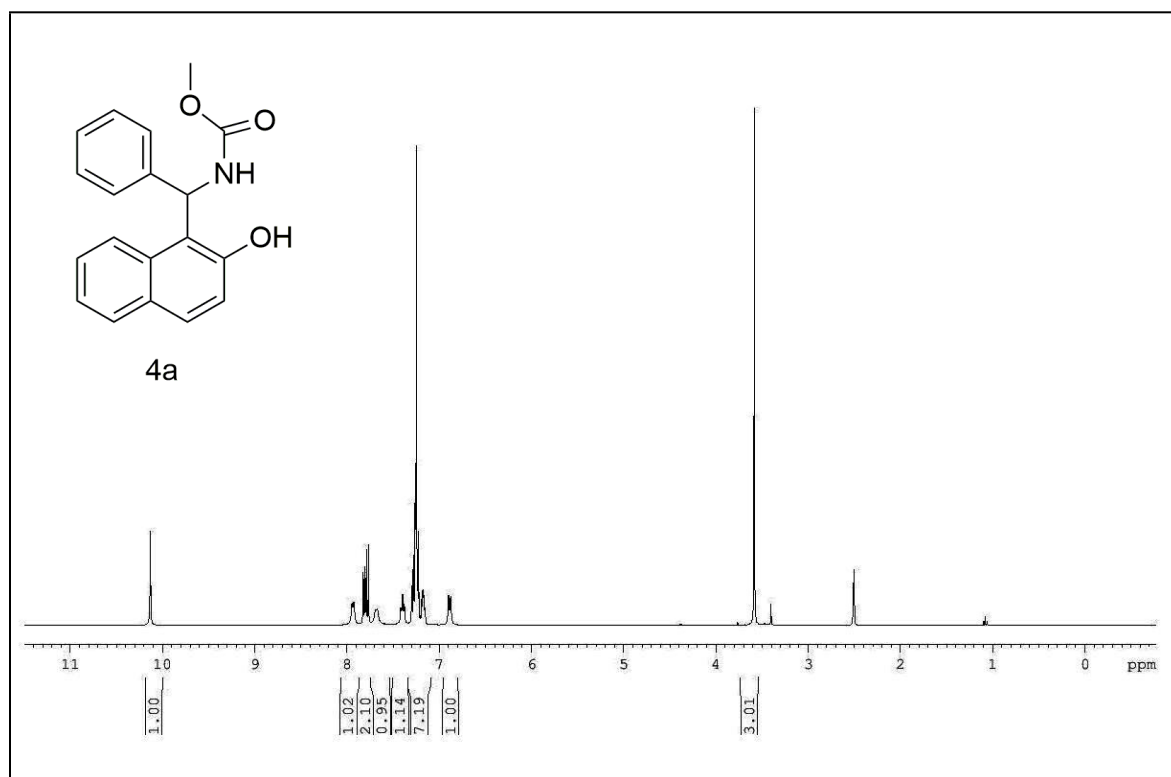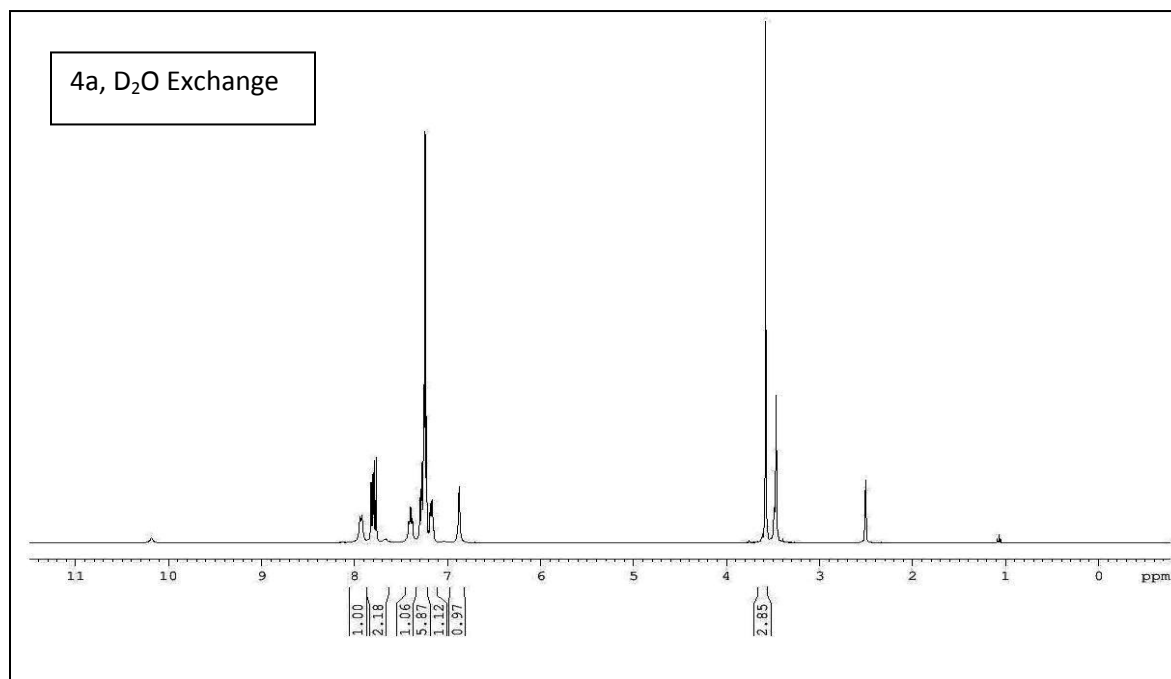

<sup>1</sup>H NMR of 4b

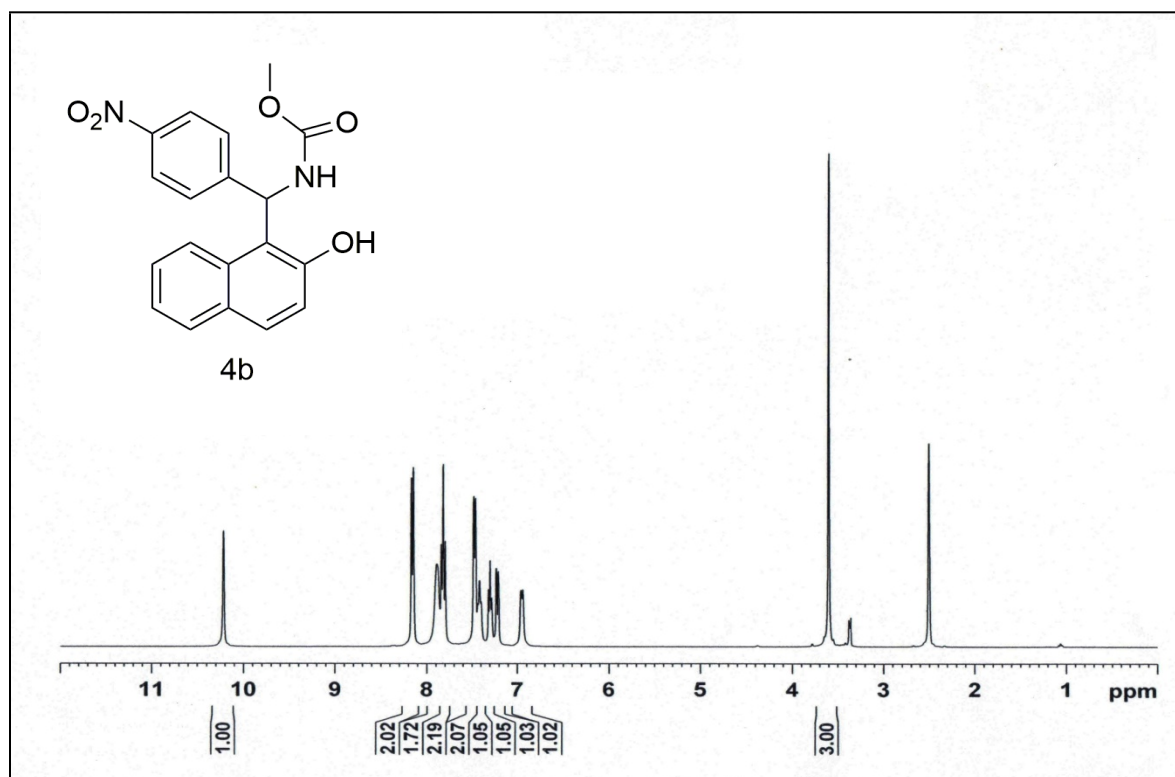

<sup>1</sup>H NMR of 4d

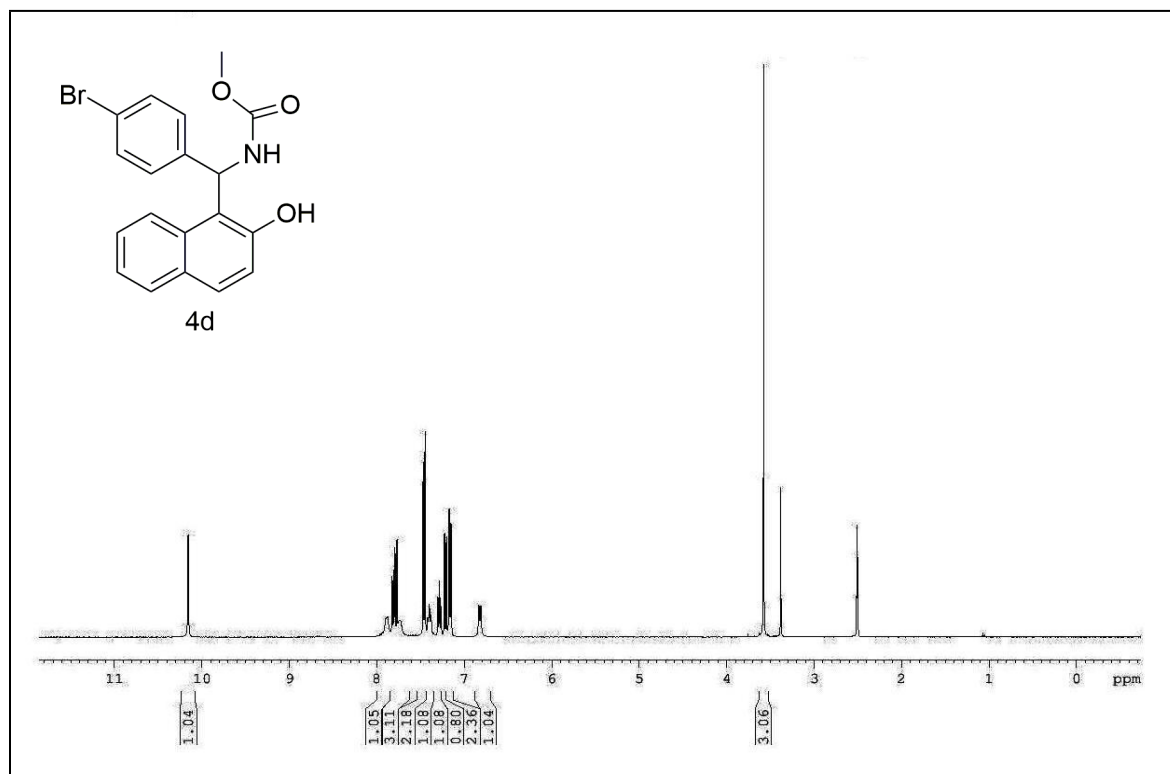

<sup>1</sup>H NMR of 4e

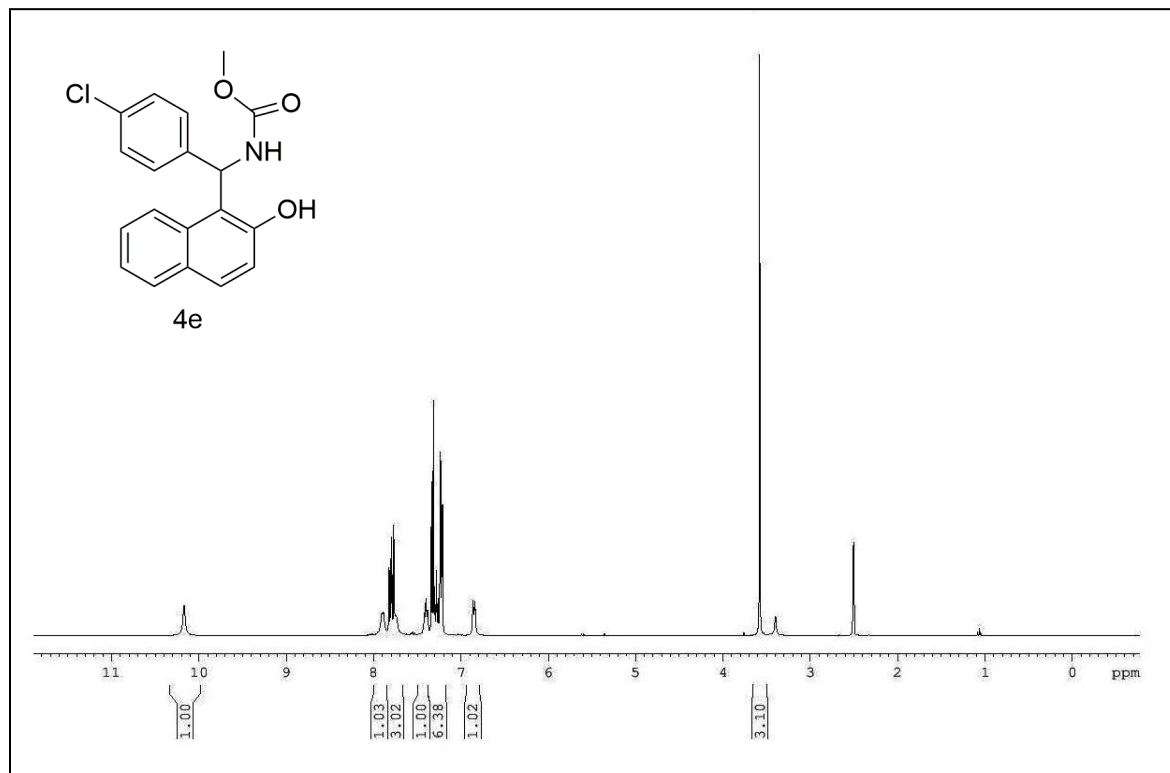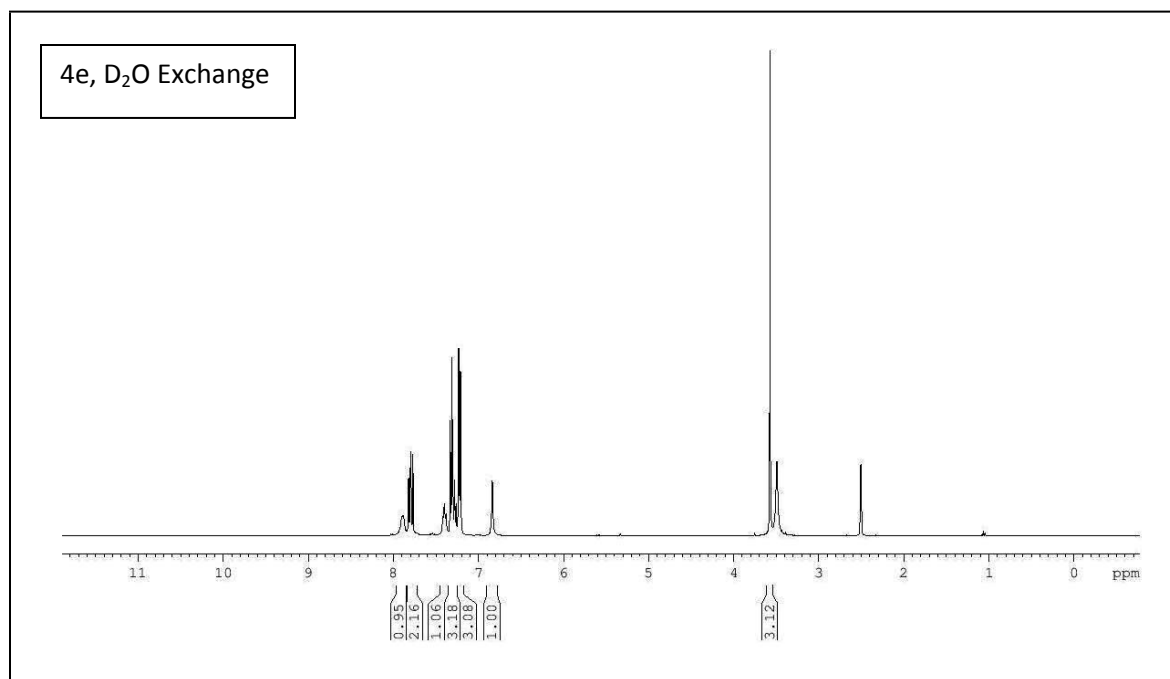

<sup>1</sup>H NMR of 4f

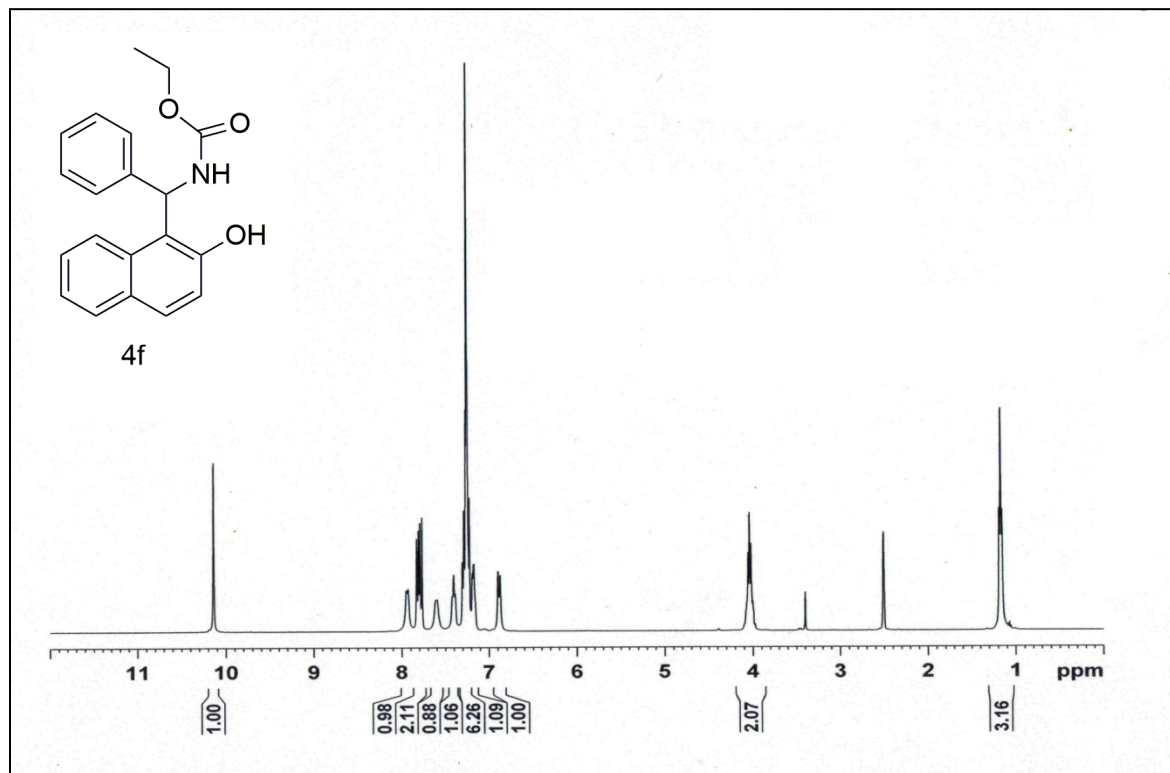

<sup>1</sup>H NMR of 4g

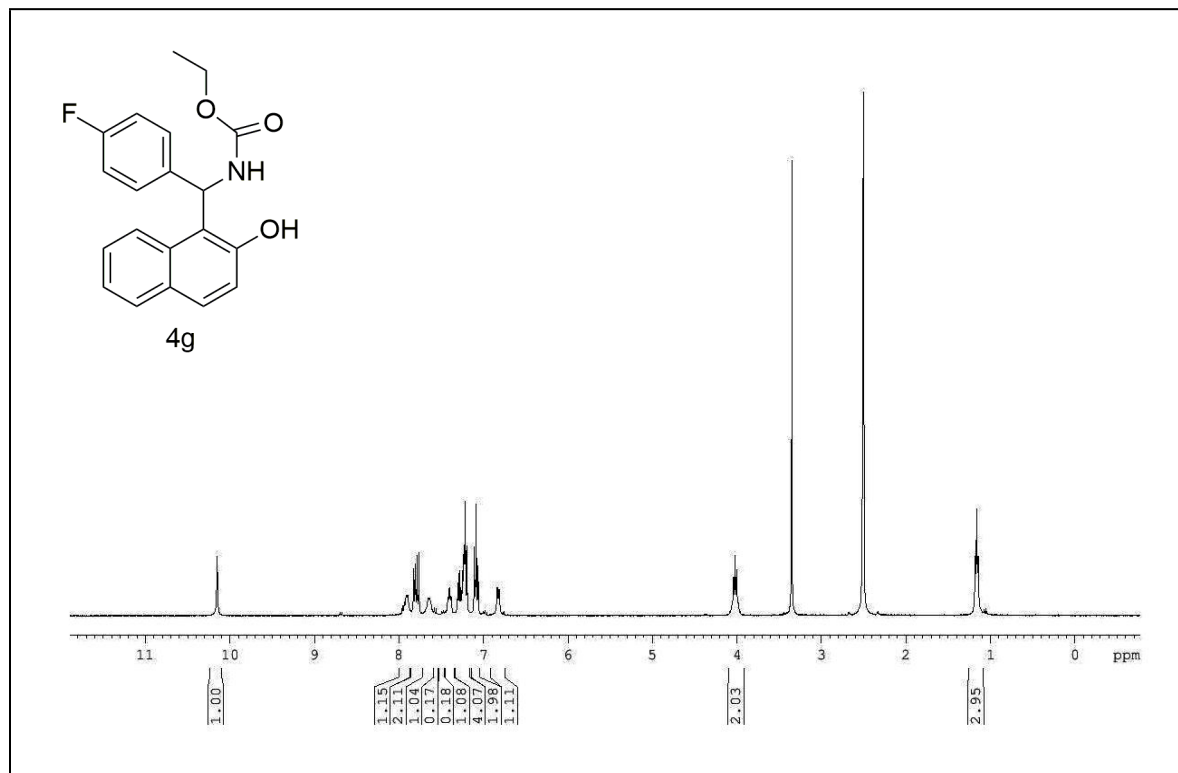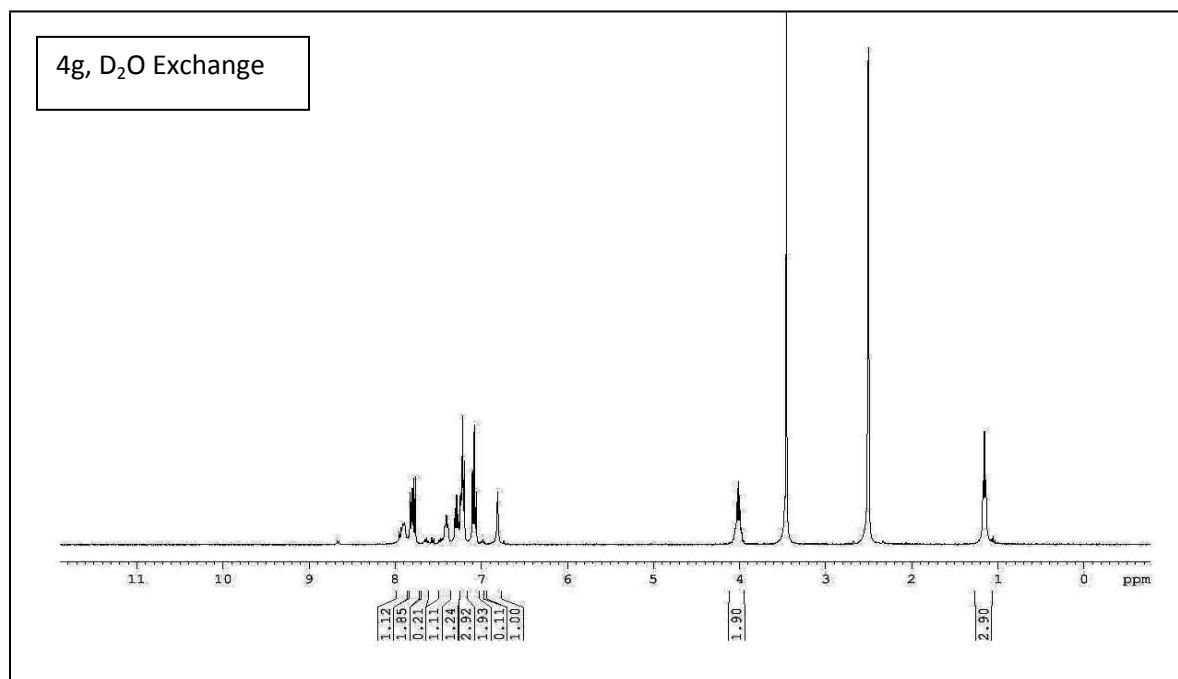

<sup>1</sup>H NMR of 4h

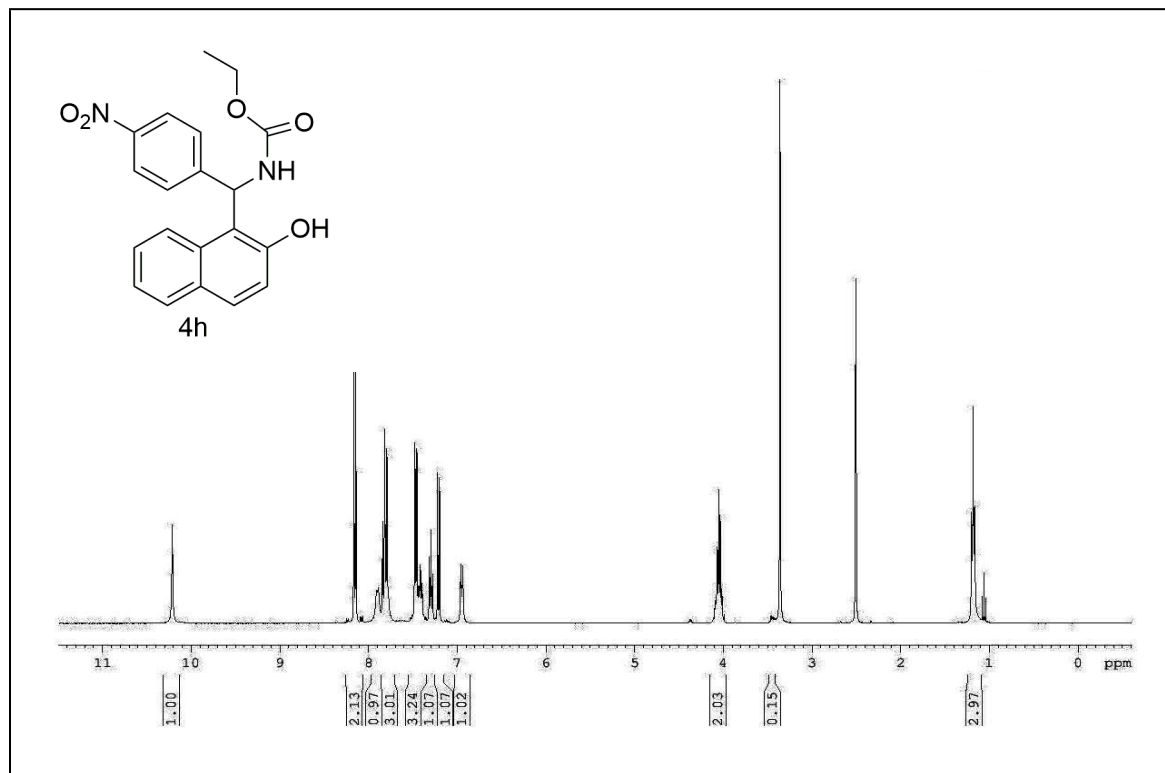



<sup>1</sup>H NMR of 4j

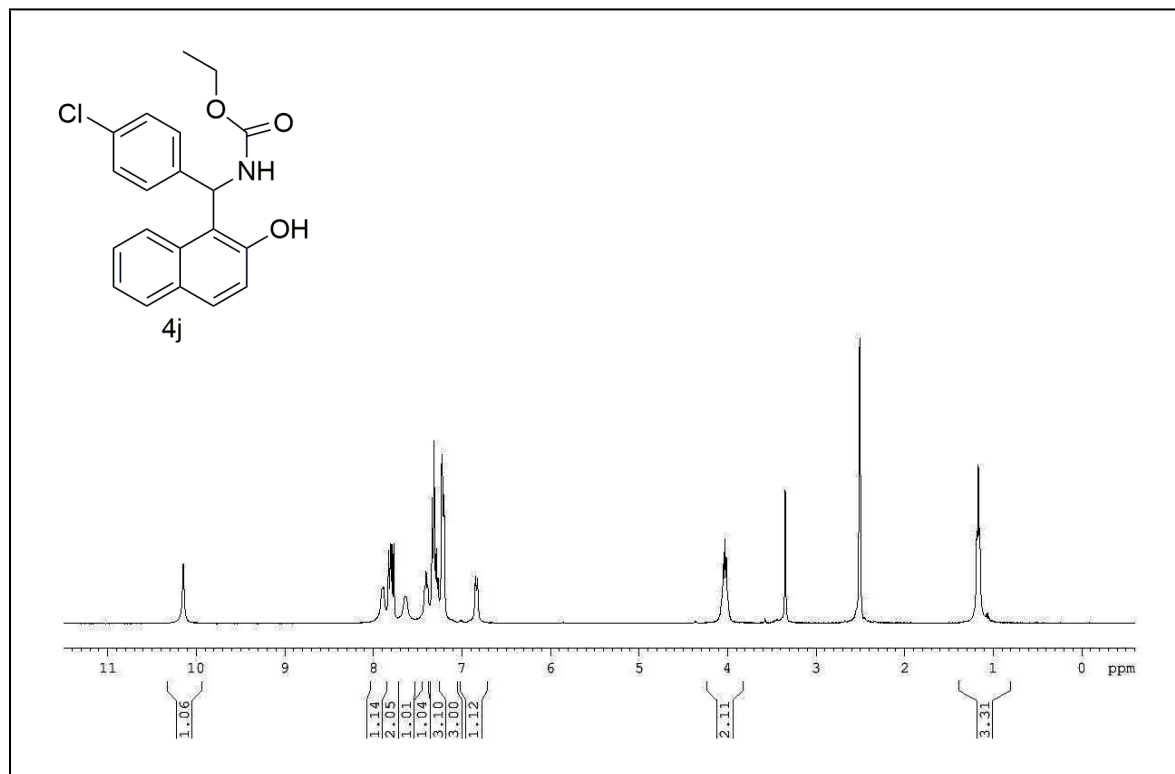

<sup>1</sup>H NMR of 4k

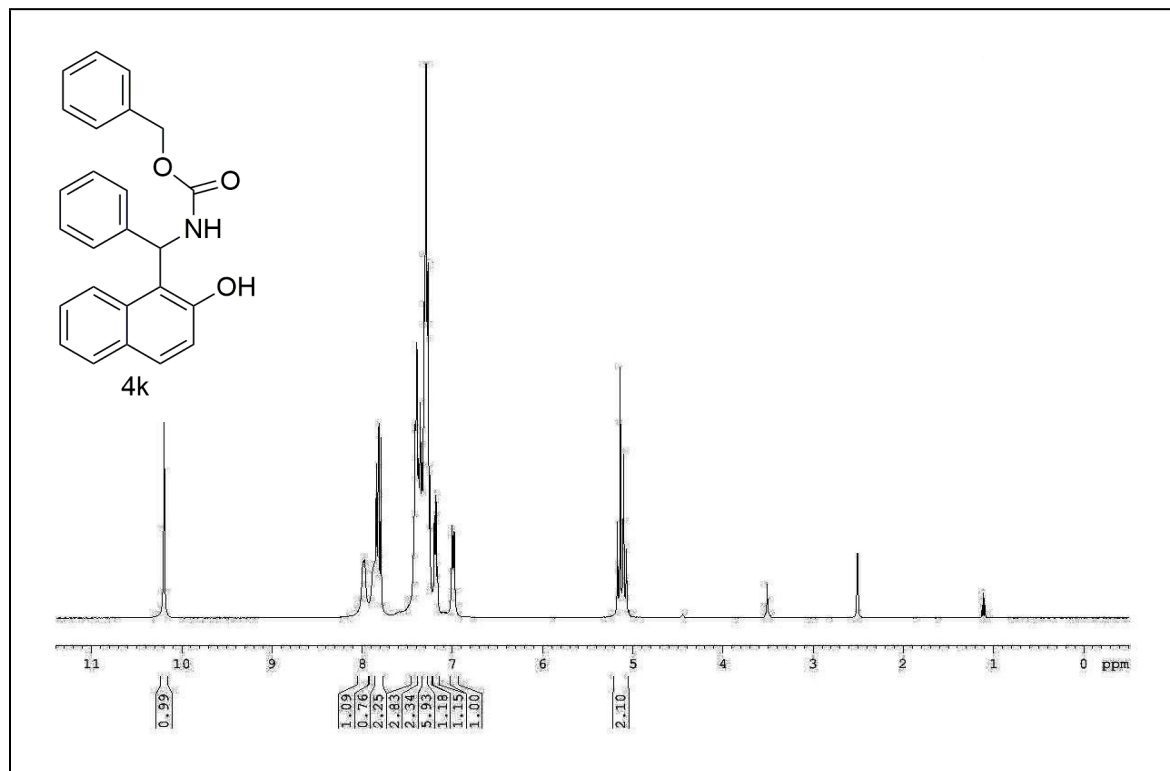

<sup>1</sup>H NMR of 4I

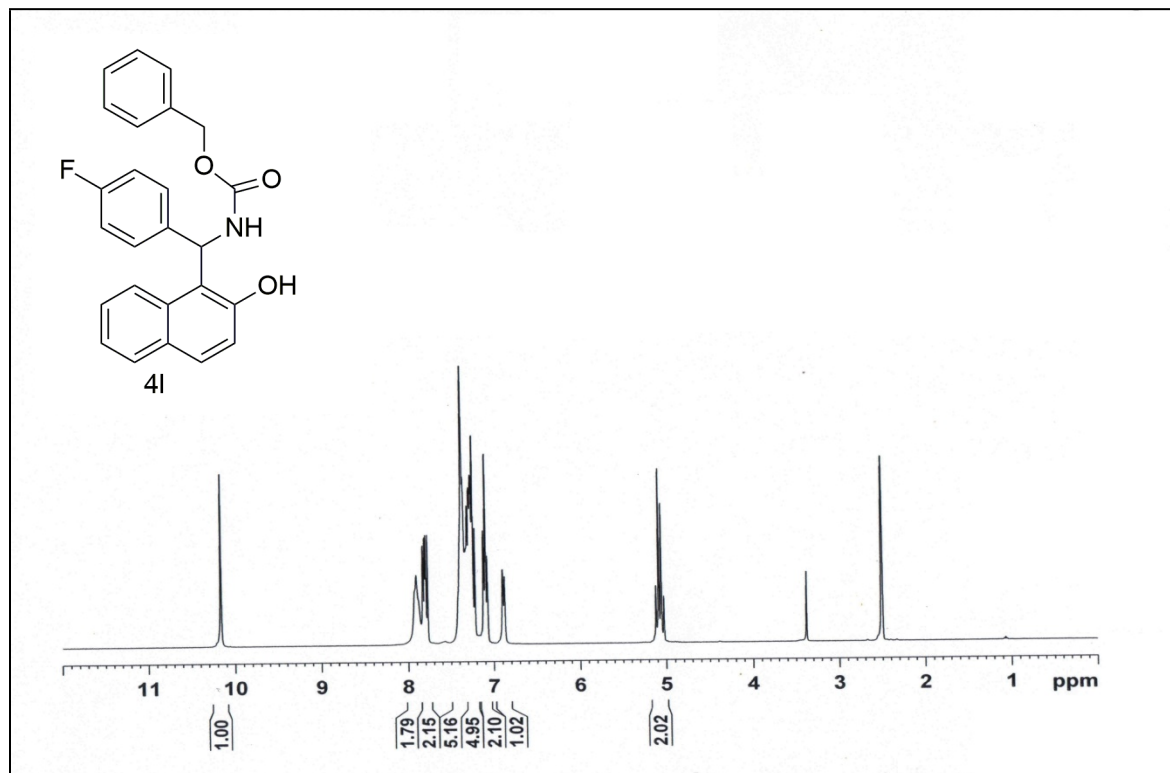

<sup>1</sup>H NMR of 4o

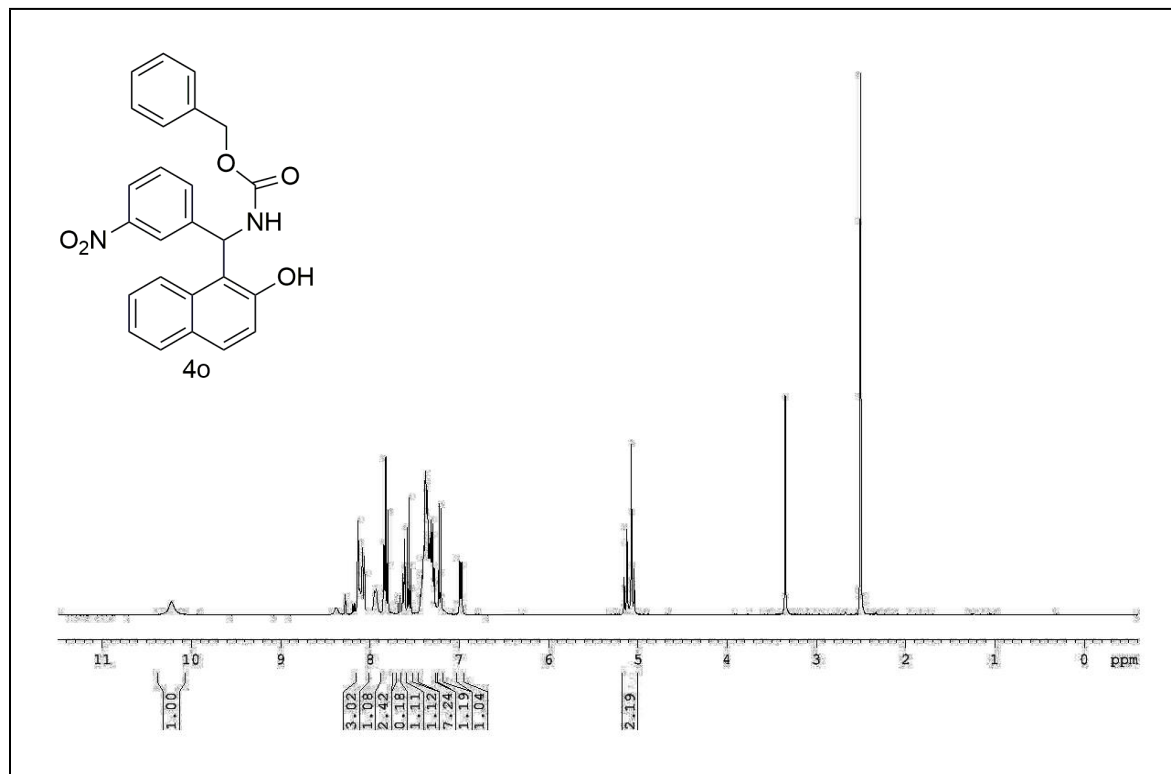

Supplement: c5cy00849b1.pdf [file c5cy00849b1.pdf]
